# Supplementary material for: Effect of Cytochrome C on the Conductance of Asolectin Membranes and the Occurrence of Through Pores at Different pHs
Source: MDPI journal article supplement (doi:10.3390/membranes13030268), 2023-02-24
Supplement: s1 [file s1]

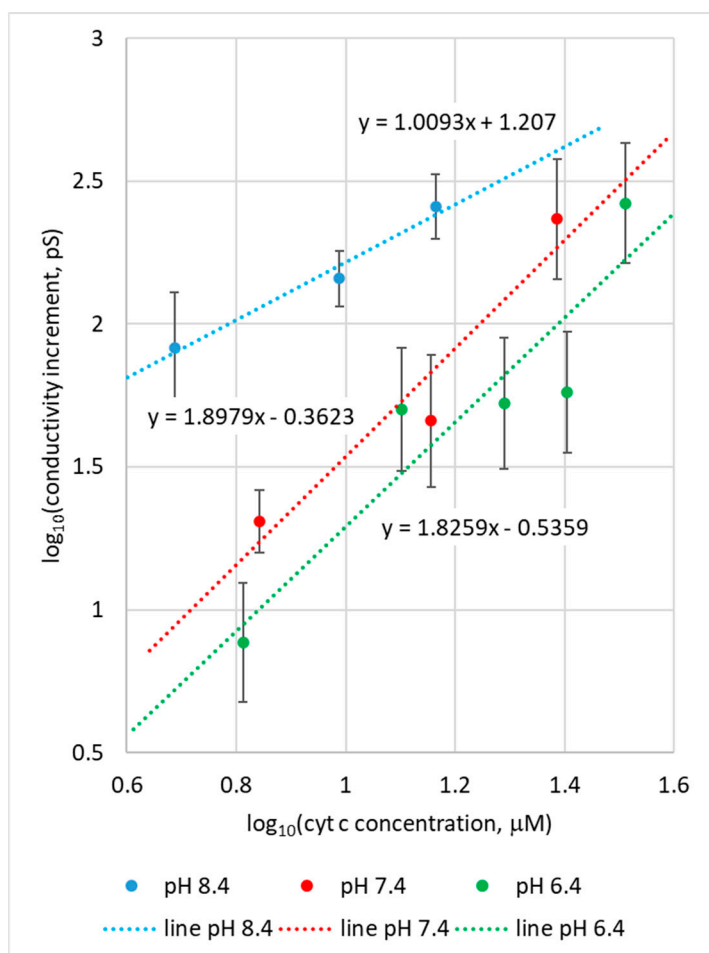

**Figure S1.** Experimental (markers) and approximating (dotted lines) dependences of conductivity increment on cyt c concentration at different pH.

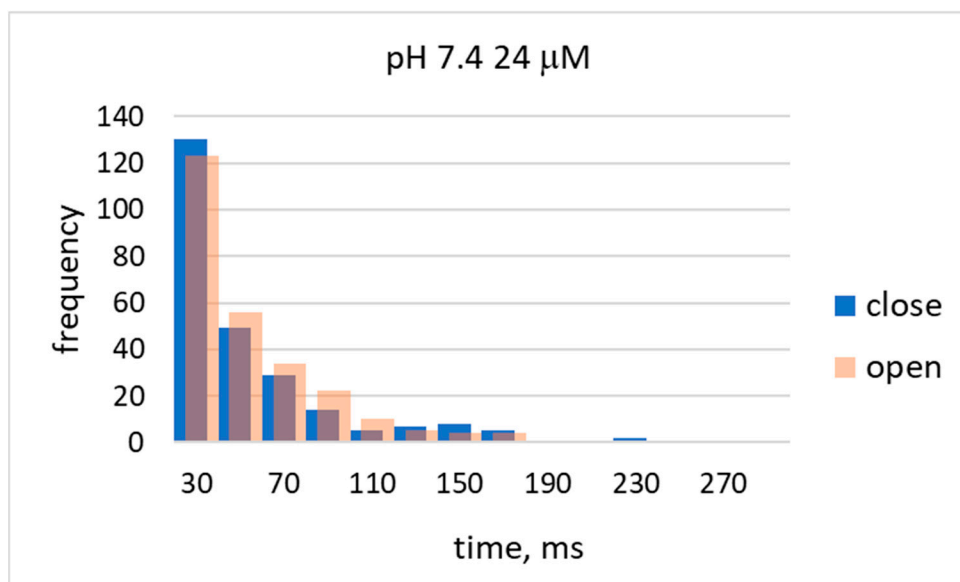

**Figure S2.** Distributions of the durations of the open and closed states of pore presented in Figure 3c. Voltage +50 mV, 0.1 M KCl, pH=7.4, 24  $\mu\text{M}$  cyt C.

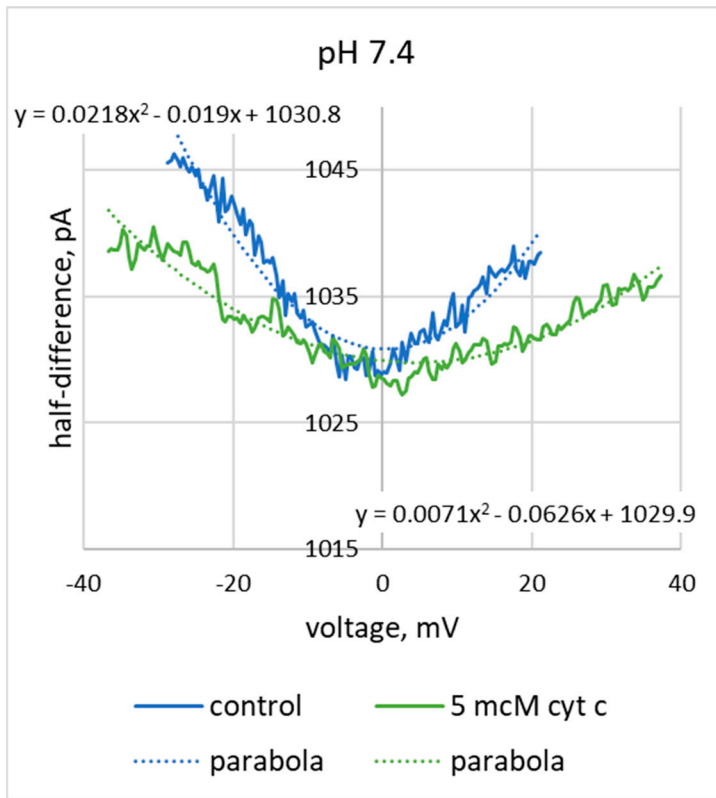

**Figure S3.** The half-difference of membrane currents in control and after one-side addition of 5  $\mu$ M cyt c. Parameters of the triangular voltage are 100 mV and 1 Hz. 0.1 M KCl, pH=7.4. The calculated minimum is shifted from 0.4 (control) to 4.4 mV.

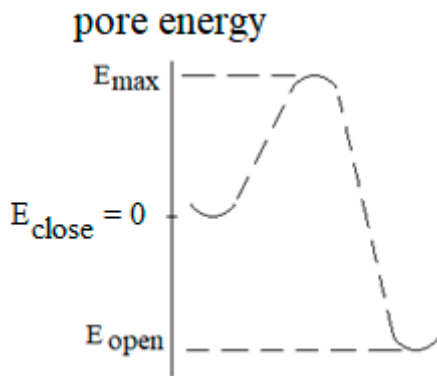

**Figure S4.** Energy diagram for the long-lived pore  $E_{open} < E_{close} = 0$

To estimate  $E_{max}$  we can use the literature on value  $\nu$ . The scatter of  $\nu$  value is significant – from  $5 \times 10^{32} \text{ s}^{-1} \text{ m}^{-3}$  [1] to  $2 \times 10^{42} \text{ s}^{-1} \text{ m}^{-3}$  [2]. In [3] we have got for  $\nu$   $5.6 \times 10^{33} \text{ s}^{-1} \text{ m}^{-3}$ .

According to [2],  $V_{pore} = V \approx 2\pi r^2 h$  is the volume of the membrane portion immediately connected with a pore,  $r = 0.4 \text{ nm}$  is the pore radius,  $h = 5 \text{ nm}$  is the membrane thickness.

$E_{max}$  values at different  $\nu$  are presented in the table:

**Table S1.** Energy barrier between the open and close states of a pore

| $\nu, \text{s}^{-1} \text{ m}^{-3}$ | $\Theta=0.4 \text{ s}, E_{max}, kT$ | $\Theta=0.06 \text{ s}, E_{max}, kT$ | reference |
|-------------------------------------|-------------------------------------|--------------------------------------|-----------|
|                                     |                                     |                                      |           |

|                      |      |      |     |
|----------------------|------|------|-----|
| $5 \times 10^{32}$   | 13.8 | 11.9 | [1] |
| $5.6 \times 10^{33}$ | 16.2 | 14.3 | [3] |
| $2 \times 10^{42}$   | 35.9 | 34.0 | [2] |

1. Powell, K. T., Derrick, E. G., & Weaver, J. C. (1986). A quantitative theory of reversible electrical breakdown in bilayer membranes. *Bioelectrochemistry and Bioenergetics*, 15(2), 243-255. [https://doi.org/10.1016/0302-4598\(86\)80031-9](https://doi.org/10.1016/0302-4598(86)80031-9)
2. Freeman, S. A., Wang, M. A., & Weaver, J. C. (1994). Theory of electroporation of planar bilayer membranes: predictions of the aqueous area, change in capacitance, and pore-pore separation. *Biophysical journal*, 67(1), 42-56.
3. Anosov, A. A., Smirnova, E. Y., Ryleeva, E. D., Gligonov, I. A., Korepanova, E. A., & Sharakshane, A. A. (2020). Estimation of the parameters of the Smoluchowski equation describing the occurrence of pores in a bilayer lipid membrane under soft poration. *The European Physical Journal E*, 43(10), 1-9.
